# Supplementary material for: Historical redlining is associated with disparities in wildlife biodiversity in four California cities
Source: PubMed Central journal article supplement (PMC11194601; doi:10.1073/pnas.2321441121), 2024-06-11
Supplement: pnas.2321441121.sapp.pdf [file pnas.2321441121.sapp.pdf]

1 **Supporting Information For**

2 Historical redlining is associated with disparities in wildlife biodiversity in four California cities

3 Cesar O. Estien\*, Mason Fidino, Christine E. Wilkinson, Rachel Morello-Frosch, and  
4 Christopher J. Schell

5 \*corresponding author: Cesar O. Estien

6 Email: [cestien@berkeley.edu](mailto:cestien@berkeley.edu)

7

8 **This PDF file includes:**

9 Additional Results

10 Figures S1-S9

11 Table S1-S8

## 12 **Supporting Information 1: Results**

### 13 Clade-level species richness across HOLC grades

#### 14 *Statewide*

15 Across clades, we found variation in species richness across HOLC grades for all, native, and  
16 nonnative species (Table S2-7). For insects, we found that greenlined neighborhoods had the  
17 highest species richness on average but found no significant differences between grades. We  
18 found the same trends for native and nonnative insect richness. For arachnids, we found that B-  
19 graded neighborhoods had the highest species richness on average but found no significant  
20 differences between grades. We found the same trends for native and nonnative arachnid  
21 richness. For birds, we found that greenlined neighborhoods had the highest species richness on  
22 average and found significant differences between green and redlined neighborhoods (8.10, CI:  
23 0.63, 15.57). We found similar trends in native bird richness, but not nonnative bird richness  
24 between green and redlined neighborhoods (1.13, CI: -0.39, 3.07). For mammals, we found that  
25 B-grade neighborhoods had the highest species richness on average but found no significant  
26 differences between grades. We found similar trends in native and nonnative mammalian  
27 richness but found significant differences between grades B and D (1.77, CI: 0.07, 3.47). For  
28 reptiles, we found that B-grade neighborhoods had the highest species richness on average but  
29 found no significant differences between grades. We found similar trends for native and  
30 nonnative richness but found significant differences in nonnative reptiles between grades B and  
31 D (1.74, CI: 0.03, 3.45). For amphibians, we found that B-grade neighborhoods had the highest  
32 species richness on average, and we found significant differences between grades A and C (0.48,  
33 CI: 0.04, 0.92), A and D (0.73, CI: 0.23, 1.23), and B and D (1.21, CI: 0.05, 2.37). We found  
34 similar trends for native richness, except no significant differences between A and C were found  
35 (0.43, CI: -0.07, 0.94). We found no significant differences in nonnative amphibian richness  
36 between HOLC grades.

#### 37 *City-level*

38 For insects, we found significant differences in richness between green and redlined  
39 neighborhoods in every city (Figure 3), and this remained true for native and nonnative insects.  
40 For arachnids, we found significant differences in richness between green and redlined  
41 neighborhoods in each city except Oakland (-0.11, CI: -0.38, 0.15). For native arachnid richness,  
42 we found significant differences between green and redlined neighborhoods in San Diego (2.35,  
43 CI: 1.11, 3.59) and San Francisco (1.44, CI: 0.34, 2.53), but not Los Angeles (0.11, CI: -0.04,  
44 0.25) and Oakland -0.09, CI: -0.21, 0.04). For nonnative arachnid richness, we found significant  
45 differences between green and redlined neighborhoods in San Diego (3.11, CI: 1.71, 4.51) and  
46 Los Angeles (0.93, CI: 0.62, 1.23), but not San Francisco (median = 1.14, CI: -0.19, 2.47) and  
47 Oakland (0.08, CI: -0.22, 0.38). For birds, we found significant differences in richness between  
48 green and redlined neighborhoods in each city (Figure 3), and this remained true for native and  
49 nonnative birds, except for nonnative birds in Oakland (0.13, CI: -0.11, 0.59). For mammals, we  
50 found significant differences between green and redlined neighborhoods in each city except for  
51 Oakland (0.12, CI: -0.29, 0.54) (Figure 3). These patterns remained true for native and non-  
52 native mammals, except for in nonnative mammalian richness in San Francisco (0.66, CI: -0.15,  
53 1.47). For reptiles, we found significant differences between green and redlined neighborhoods

54 in each city except for Oakland (0.12, CI: -0.23, 0.11), and these trends remained true for native  
55 reptiles. For nonnative reptiles, we only found a significant difference between green and  
56 redlined neighborhoods in Los Angeles (0.27, CI: 0.03, 0.51) and San Diego (0.47, CI: 0.01,  
57 0.93), but not Oakland (.11, CI: -0.22, 0.44) or San Francisco (0.27, CI: -0.65, 1.18). For  
58 amphibians, we found significant differences between green and redlined neighborhoods in each  
59 city, and these trends remained true for native and nonnative amphibian richness, except for  
60 nonnative amphibians in Oakland (1.51, CI: -2.31, 5.33) and San Francisco (0.22, CI: -0.08,  
61 0.53).

62 **Supporting Information 2: Figures**

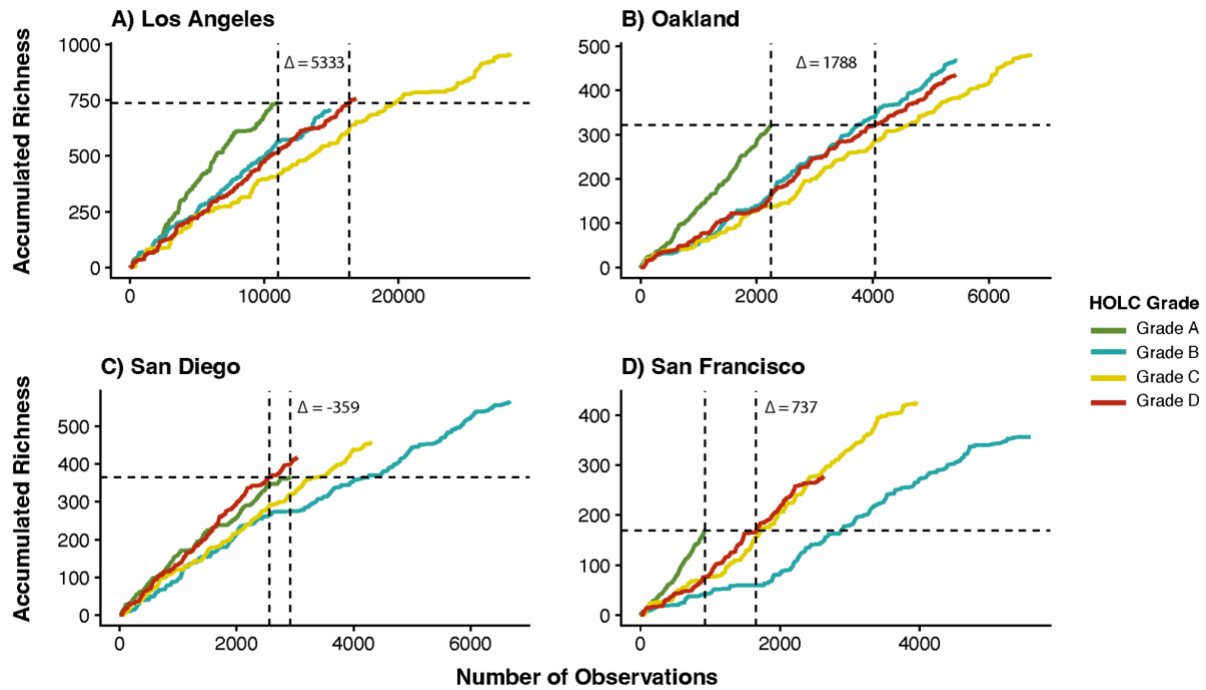

63

64 **Figure S1.** City-level species accumulation curve per HOLC grade. Species accumulation curves  
 65 for each HOLC grade across six clades for all species in (A) Los Angeles, (B) Oakland, (C)  
 66 Oakland, and San Francisco. The x-axis shows the number of observations within each HOLC  
 67 grade. The y-axis shows accumulated species richness. The dashed horizontal line\* shows the  
 68 maximum accumulated richness for Grade A. The vertical lines\*\* show the number of  
 69 observations to reach Grade A’s maximum accumulated richness in Grade A (left vertical line)  
 70 and in Grade D (right vertical line). The difference in observations between redlined (i.e., grade  
 71 D) and greenlined (i.e., grade A) and neighborhoods is shown as a delta value.

72 \*Horizontal line (y): Los Angeles: 738; Oakland: 322; San Diego: 365; San Francisco: 169

73 \*\*Vertical lines (x; grade A, grade D): Los Angeles: 11005, 16338; Oakland: 2247, 4035; San  
 74 Diego: 2917, 2558; San Francisco: 921, 1658

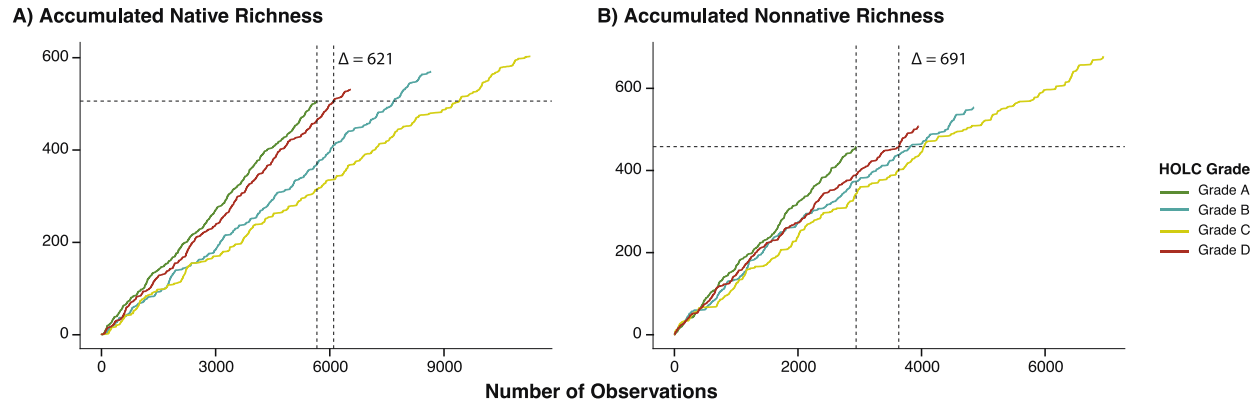

75

76 **Figure S2.** Native and nonnative species accumulation curve per HOLC grade. Species  
 77 accumulation curves for each HOLC grade across six clades for (A) native species and (B)  
 78 nonnative species. The x-axis shows the number of observations within each HOLC grade. The  
 79 y-axis shows accumulated species richness. The dashed horizontal line\* shows the maximum  
 80 accumulated richness for Grade A. The vertical lines\*\* show the number of observations to  
 81 reach Grade A's maximum accumulated richness in Grade A (left vertical line) and in Grade D  
 82 (right vertical line). The difference in observations between redlined (i.e., grade D) and  
 83 greenlined (i.e., grade A) and neighborhoods is shown as a delta value.

84 \*Horizontal lines (y): native = 506; nonnative = 458

85 \*\*Vertical lines (x; grade A, grade D): native = 4607, 5228, nonnative = 2941, 3632

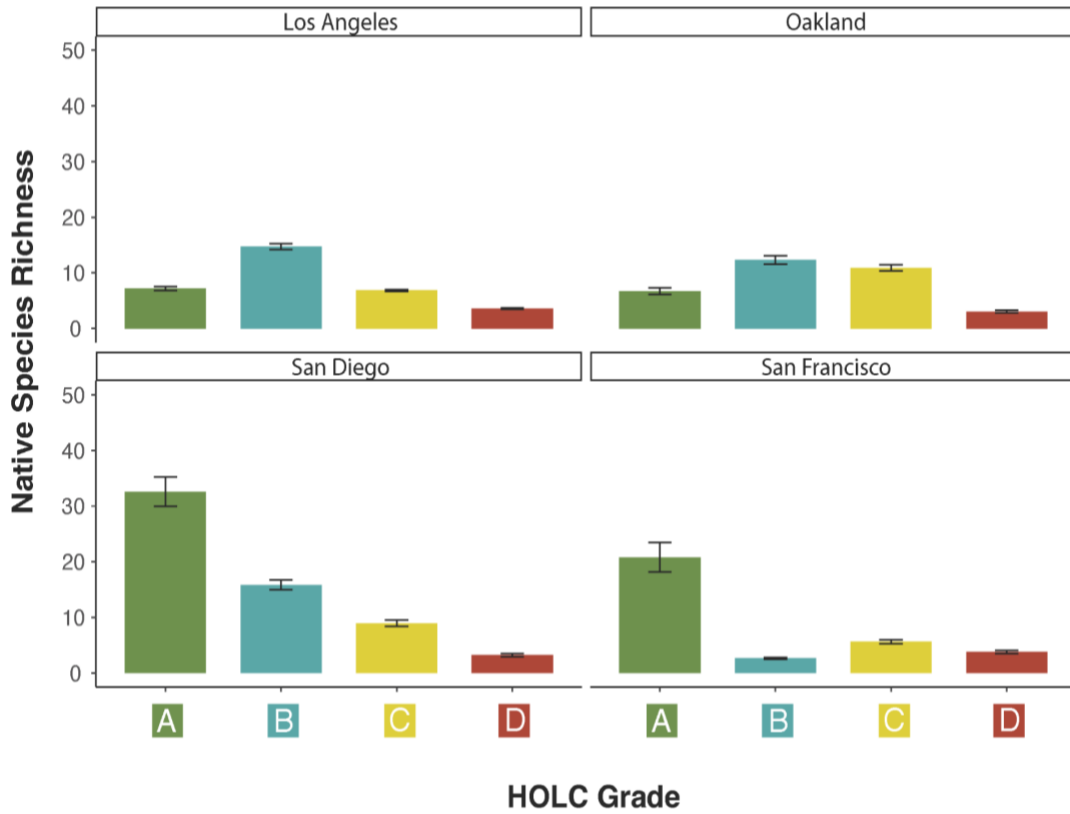

86

87 **Figure S3.** City-level differences in native species richness across HOLC grades. The  
 88 relationship between HOLC grade and native species richness for Los Angeles (top left),  
 89 Oakland (top right), (C) San Diego (bottom left), and San Francisco (bottom right). Bars  
 90 represent the mean, and whiskers represent 2.5 and 97.5% confidence intervals. All pair-wise  
 91 comparisons are significant except grades A and C in Los Angeles.

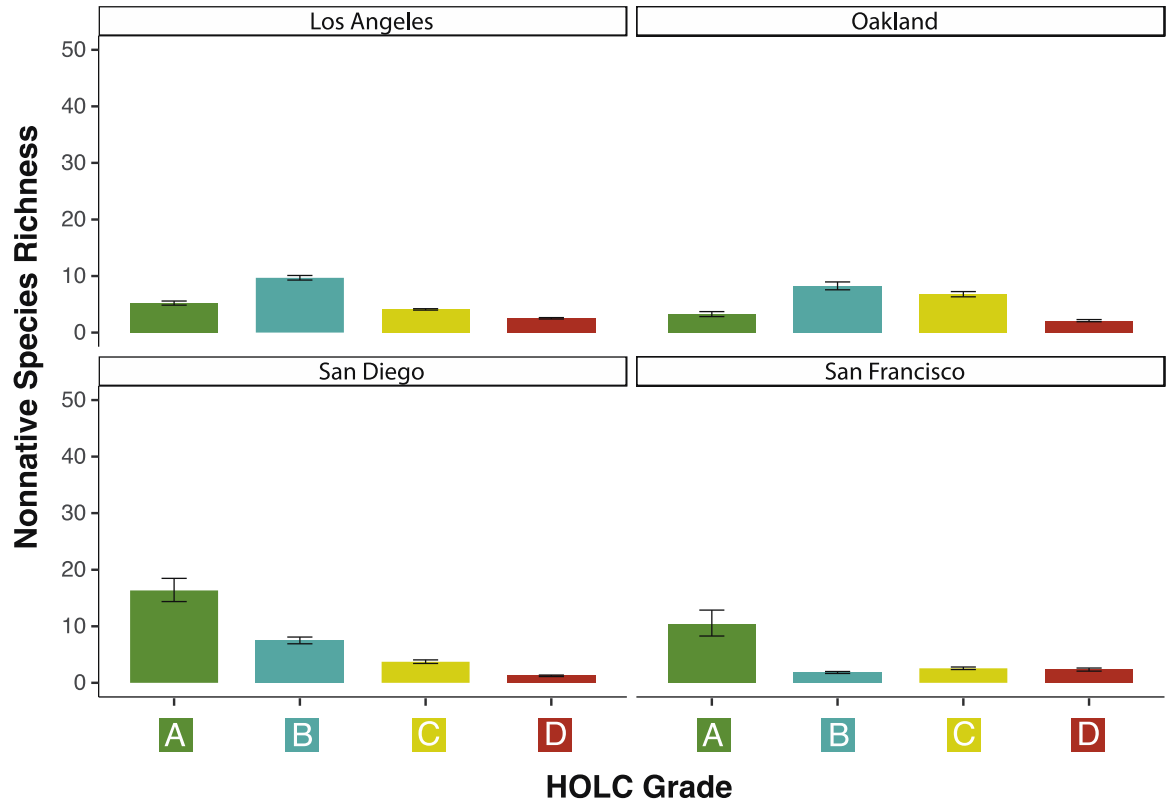

92

93 **Figure S4.** City-level differences in nonnative species richness. The relationship between HOLC  
 94 grade and nonnative species richness for Los Angeles (top left), Oakland (top right), (C) San  
 95 Diego (bottom left), and San Francisco (bottom right). Bars represent the mean, and whiskers  
 96 represent 2.5 and 97.5% confidence intervals. All pair-wise comparisons are significant except  
 97 grades C and D in San Francisco.

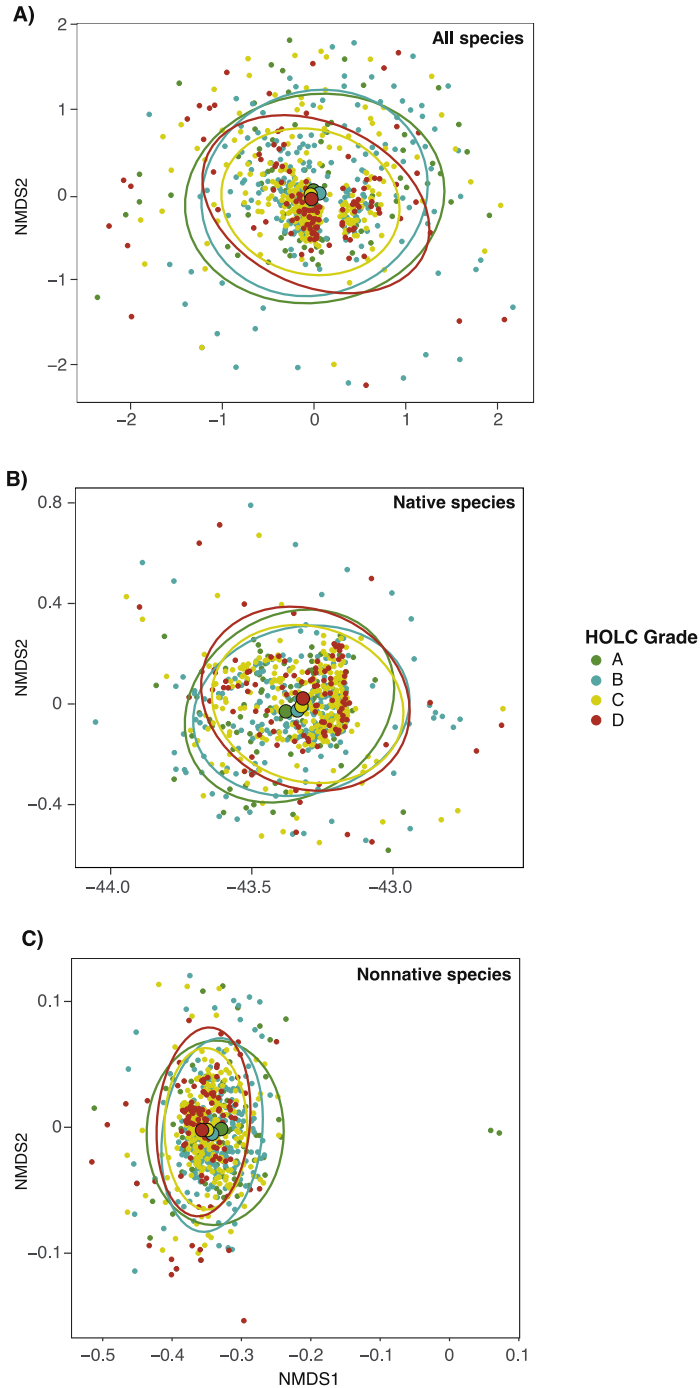

98

99 **Figure S5.** HOLC grade beta diversity. Non-metric multidimensional scaling (NMDS) for  $\beta$ -  
 100 diversity (Jaccard's metric) among HOLC grades for (A) all species, (B) native species, and (C)  
 101 nonnative species. Each dot represents a neighborhood within a city and ellipses encompass 95%  
 102 data points. No overlap between ellipses suggests that HOLC grades have distinct beta diversity  
 103 patterns and strong dissimilarity in species assemblage. Substantial overlap in ellipses suggests  
 104 that beta diversity between HOLC grades is more similar to each other and there is strong  
 105 similarity in species assemblage.



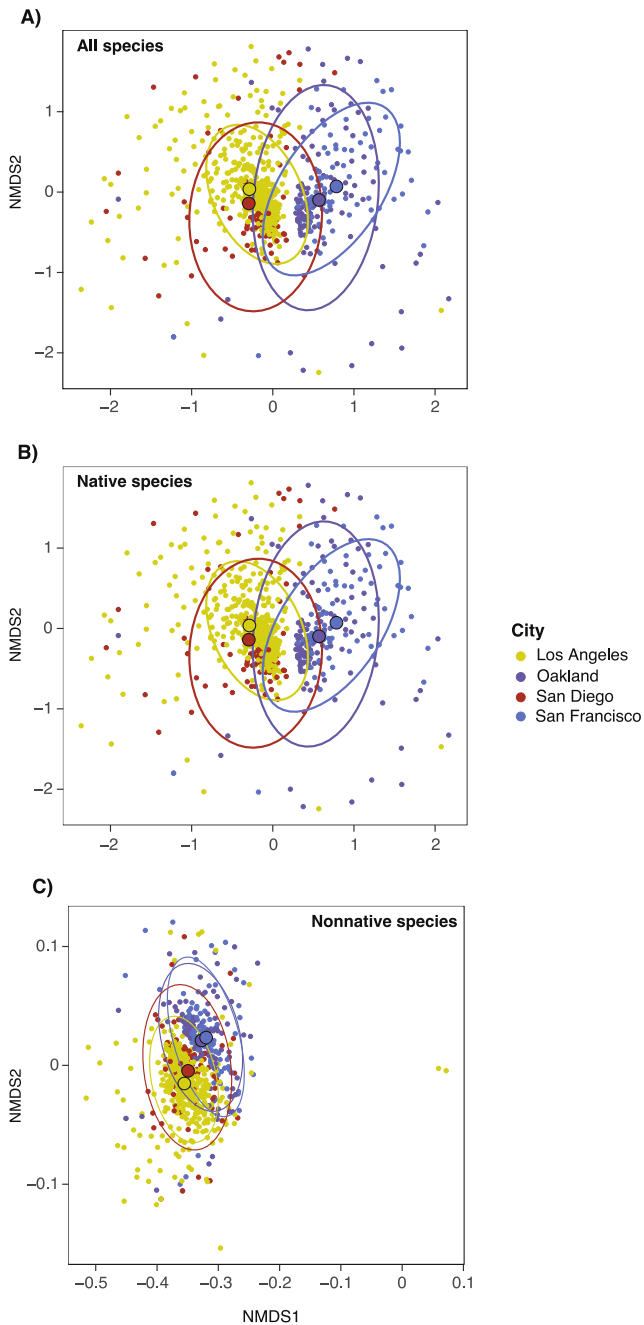

106

107 **Figure S6.** Beta diversity per city. Non-metric multidimensional scaling (NMDS) for  $\beta$ -diversity  
 108 (Jaccard's metric) among cities for (A) all species, (B) native species, and (C) nonnative species.  
 109 Each dot represents a neighborhood within a city and ellipses encompass 95% data points. No  
 110 overlap between ellipses suggests that cities have distinct beta diversity patterns and strong  
 111 dissimilarity in species assemblage. Substantial overlap in ellipses suggests that beta diversity  
 112 between cities is more similar to each other and there is strong similarity in species assemblage.  
 113 *Note: Outlier points removed for native (2 points) and nonnative species (2 points) in Los*  
 114 *Angeles as well as nonnative species (1 point) in Oakland to assist in visualization.*

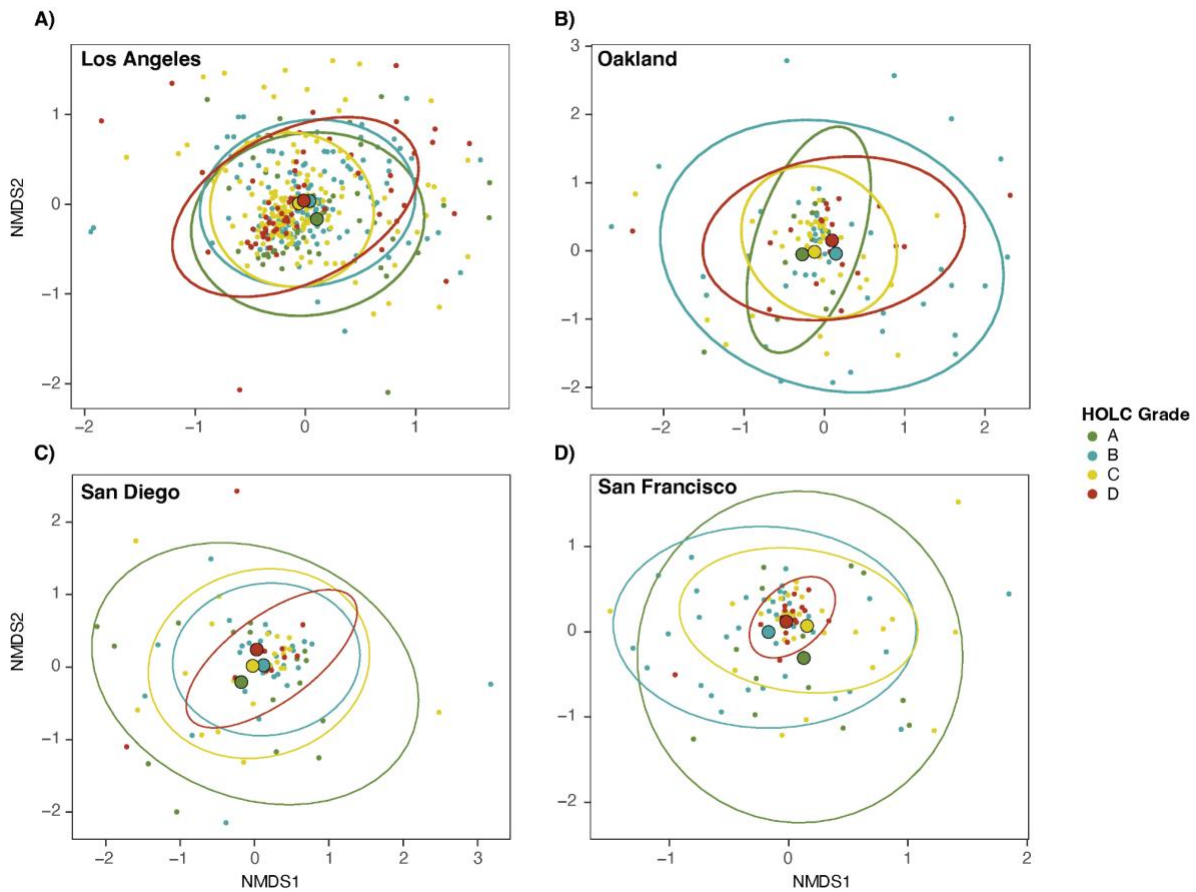

115

116 **Figure S7.** HOLC grade native beta diversity by city. Non-metric multidimensional scaling  
 117 (NMDS) for native  $\beta$ -diversity (Jaccard's metric) among HOLC grades in (A) Los Angeles, (B)  
 118 Oakland, (C) San Diego, and (D) San Francisco. Each dot represents a neighborhood within a  
 119 city and ellipses encompass 95% data points. No overlap between ellipses suggests that HOLC  
 120 grades have distinct beta diversity patterns and strong dissimilarity in native species assemblage.  
 121 Substantial overlap in ellipses suggests that beta diversity between HOLC grades is more similar  
 122 to each other and there is strong similarity in native species assemblage. *Note: Outlier points*  
 123 *removed for Los Angeles to assist in visualization (2 points in grade D).*

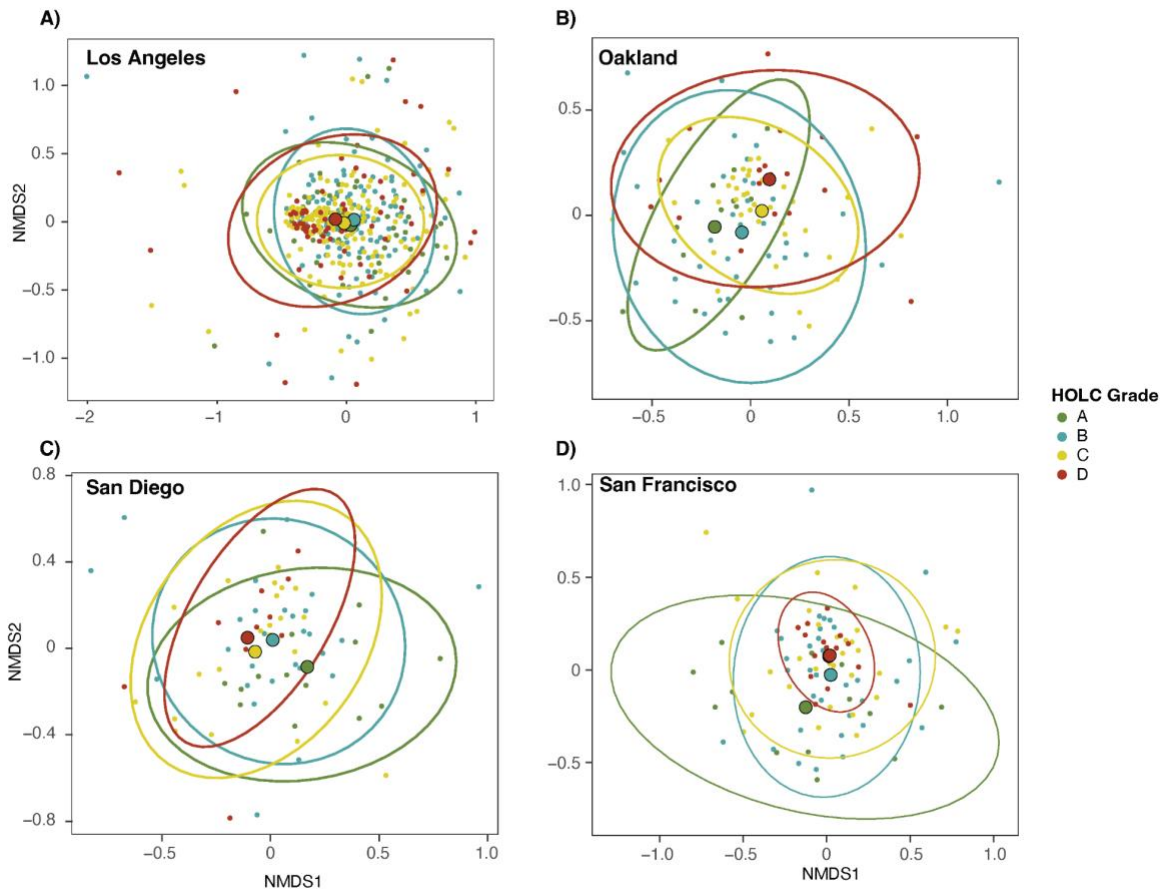

124

125 **Figure S8.** HOLC grade nonnative beta diversity by city. Non-metric multidimensional scaling  
 126 (NMDS) for nonnative  $\beta$ -diversity (Jaccard's metric) among HOLC grades in (A) Los Angeles,  
 127 (B) Oakland, (C) San Diego, and (D) San Francisco. Each dot represents a neighborhood within  
 128 a city and ellipses encompass 95% data points. No overlap between ellipses suggests that HOLC  
 129 grades have distinct beta diversity patterns and strong dissimilarity in nonnative species  
 130 assemblage. Substantial overlap in ellipses suggests that beta diversity between HOLC grades is  
 131 more similar to each other and there is strong similarity in nonnative species assemblage. *Note:*  
 132 *Outlier points removed for Los Angeles (2 points in grade D) and Oakland (1 point in grade C)*  
 133 *to assist in visualization.*

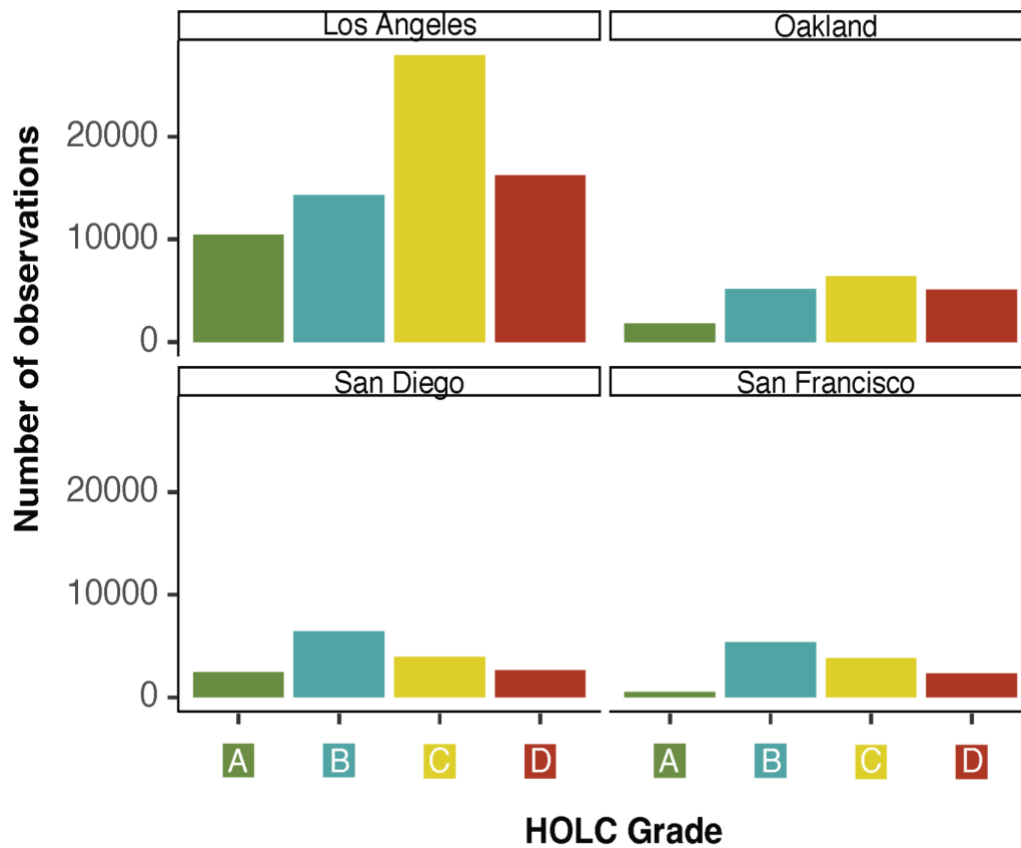

134

135 **Figure S9.** iNaturalist observations across HOLC grades per city. iNaturalist observations for  
 136 Los Angeles (top left), Oakland (top right), (C) San Diego (bottom left), and San Francisco  
 137 (bottom right) for each HOLC grade.

138 **Supporting Information 3: Tables**

139 **Table S1.** Overall clade species richness.

| <b>Clade</b> | <b>HOLC Grade</b> | <b>Mean Richness</b> | <b>Mean Native Richness</b> | <b>Mean Nonnative Richness</b> |
|--------------|-------------------|----------------------|-----------------------------|--------------------------------|
| Mammal       | A                 | 1.29 (0.24, 3.83)    | 0.69 (0.17, 1.76)           | 1.03 (0.22, 3.01)              |
| Mammal       | B                 | 1.58 (0.26, 5.88)    | 0.81 (0.16, 2.6)            | 1.52 (0.29, 4.52)              |
| Mammal       | C                 | 1.07 (0.18, 4)       | 0.74 (0.15, 2.23)           | 0.63 (0.1, 2.69)               |
| Mammal       | D                 | 0.53 (0.08, 2.31)    | 0.29 (0.06, 1.04)           | 0.39 (0.06, 1.69)              |
| Bird         | A                 | 6.91 (1.22, 20.96)   | 5.96 (1.06, 17.82)          | 1.05 (0.18, 3.4)               |
| Bird         | B                 | 4.88 (0.55, 31.72)   | 4.03 (0.46, 26.14)          | 1.07 (0.12, 6.06)              |
| Bird         | C                 | 4.15 (0.59, 19.14)   | 3.49 (0.51, 15.91)          | 0.85 (0.12, 4.02)              |
| Bird         | D                 | 1.75 (0.27, 7.36)    | 1.46 (0.23, 6.01)           | 0.36 (0.05, 1.76)              |
| Insect       | A                 | 8.91 (1.3, 29.65)    | 4.5 (0.63, 15.5)            | 4.7 (0.71, 15.07)              |
| Insect       | B                 | 6.27 (0.67, 38.31)   | 3.17 (0.33, 19.47)          | 3.39 (0.37, 21.27)             |
| Insect       | C                 | 4.88 (0.54, 28.77)   | 2.52 (0.26, 15.62)          | 2.57 (0.29, 14.54)             |
| Insect       | D                 | 2.58 (0.3, 15.25)    | 1.29 (0.14, 7.84)           | 1.4 (0.17, 7.87)               |
| Arachnid     | A                 | 1.72 (0.25, 5.83)    | 0.63 (0.09, 2.43)           | 1.5 (0.32, 4.05)               |
| Arachnid     | B                 | 1.74 (0.18, 10.29)   | 0.85 (0.09, 5.03)           | 1.56 (0.23, 6.6)               |
| Arachnid     | C                 | 1.17 (0.12, 7.39)    | 0.55 (0.05, 3.85)           | 1 (0.15, 4.67)                 |
| Arachnid     | D                 | 0.56 (0.06, 3.97)    | 0.25 (0.02, 1.96)           | 0.52 (0.07, 2.96)              |
| Reptile      | A                 | 1.37 (0.24, 4.51)    | 1.42 (0.24, 4.59)           | 0.36 (0.1, 1.18)               |
| Reptile      | B                 | 1.41 (0.18, 6.63)    | 1.45 (0.19, 6.86)           | 0.97 (0.16, 3.79)              |

|           |   |                   |                   |                   |
|-----------|---|-------------------|-------------------|-------------------|
| Reptile   | C | 0.79 (0.1, 4.63)  | 0.8 (0.1, 4.69)   | 0.57 (0.13, 1.91) |
| Reptile   | D | 0.4 (0.05, 2.88)  | 0.43 (0.05, 3.19) | 0.16 (0.04, 0.65) |
| Amphibian | A | 0.88 (0.49, 1.53) | 0.84 (0.42, 1.56) | 0.82 (0.21, 2.99) |
| Amphibian | B | 0.9 (0.28, 2.64)  | 0.9 (0.25, 2.83)  | 1.4 (0.22, 8.72)  |
| Amphibian | C | 0.5 (0.24, 0.86)  | 0.5 (0.2, 0.97)   | 0.47 (0.1, 2.42)  |
| Amphibian | D | 0.23 (0.1, 0.52)  | 0.23 (0.09, 0.55) | 0.16 (0.03, 0.99) |

140 Species richness for each clade is shown for all cities per HOLC grade (grades A = “best” and  
141 “greenlined”, B, C, and D = “hazardous” and “redlined”). We show overall species richness,  
142 native species richness, and nonnative species richness with mean and 95% credible intervals.

143 **Table S2.** City-level mammal species richness.

| <b>City</b>   | <b>HOLC Grade</b> | <b>Mean Richness</b> | <b>Mean Native Richness</b> | <b>Mean Nonnative Richness</b> |
|---------------|-------------------|----------------------|-----------------------------|--------------------------------|
| Los Angeles   | A                 | 4.7 (4.42, 4.99)     | 2.34 (2.14, 2.56)           | 2.63 (2.41, 2.87)              |
| Los Angeles   | B                 | 8.75 (8.42, 9.09)    | 4.38 (4.16, 4.62)           | 4.89 (4.62, 5.16)              |
| Los Angeles   | C                 | 4.35 (4.24, 4.48)    | 2.32 (2.23, 2.41)           | 2.27 (2.18, 2.36)              |
| Los Angeles   | D                 | 2.98 (2.85, 3.12)    | 1.52 (1.43, 1.62)           | 1.62 (1.52, 1.73)              |
| Oakland       | A                 | 5.17 (4.64, 5.77)    | 2.24 (1.91, 2.6)            | 2.43 (2.05, 2.87)              |
| Oakland       | B                 | 9.83 (9.16, 10.52)   | 3.73 (3.38, 4.11)           | 5.32 (4.82, 5.86)              |
| Oakland       | C                 | 9.77 (9.22, 10.34)   | 4.27 (3.94, 4.61)           | 4.53 (4.16, 4.91)              |
| Oakland       | D                 | 2.95 (2.72, 3.18)    | 1.29 (1.15, 1.43)           | 1.36 (1.22, 1.52)              |
| San Diego     | A                 | 21.71 (19.54, 24.1)  | 12.81 (11.05, 14.76)        | 8.95 (7.67, 10.4)              |
| San Diego     | B                 | 8.46 (7.91, 9.04)    | 4.88 (4.44, 5.34)           | 3.68 (3.34, 4.04)              |
| San Diego     | C                 | 4.64 (4.31, 4.99)    | 2.72 (2.45, 3)              | 2 (1.79, 2.22)                 |
| San Diego     | D                 | 1.77 (1.61, 1.94)    | 1.09 (0.96, 1.24)           | 0.71 (0.62, 0.81)              |
| San Francisco | A                 | 16.18 (13.5, 19.2)   | 10.3 (7.94, 13.22)          | 8.01 (6.13, 10.18)             |
| San Francisco | B                 | 2.83 (2.6, 3.07)     | 2.11 (1.87, 2.36)           | 1.31 (1.17, 1.47)              |

|               |   |                   |                   |                   |
|---------------|---|-------------------|-------------------|-------------------|
| San Francisco | C | 3.53 (3.27, 3.81) | 2.31 (2.07, 2.58) | 1.84 (1.65, 2.03) |
| San Francisco | D | 2.91 (2.65, 3.2)  | 1.64 (1.43, 1.86) | 1.74 (1.51, 1.98) |

144 Mammalian species richness is shown for each city per HOLC grade (grades A = “best” and  
145 “greenlined”, B, C, and D = “hazardous” and “redlined”). We show overall species richness,  
146 native species richness, and nonnative species richness with mean and 95% credible intervals.



147 **Table S3.** City-level bird species richness across HOLC grades.

| <b>City</b>   | <b>HOLC Grade</b> | <b>Mean Richness</b> | <b>Mean Native Richness</b> | <b>Mean Nonnative Richness</b> |
|---------------|-------------------|----------------------|-----------------------------|--------------------------------|
| Los Angeles   | A                 | 3.79 (3.53, 4.07)    | 3.26 (3.02, 3.5)            | 0.88 (0.73, 1.05)              |
| Los Angeles   | B                 | 8.68 (8.3, 9.07)     | 7.4 (7.04, 7.76)            | 2.06 (1.85, 2.29)              |
| Los Angeles   | C                 | 3.46 (3.35, 3.58)    | 3.07 (2.96, 3.19)           | 0.71 (0.66, 0.77)              |
| Los Angeles   | D                 | 1.57 (1.49, 1.65)    | 1.37 (1.3, 1.45)            | 0.34 (0.3, 0.39)               |
| Oakland       | A                 | 3.81 (3.35, 4.33)    | 3.63 (3.17, 4.16)           | 0.36 (0.24, 0.53)              |
| Oakland       | B                 | 7.19 (6.58, 7.84)    | 6.26 (5.71, 6.86)           | 1.03 (0.76, 1.38)              |
| Oakland       | C                 | 5.51 (5.15, 5.89)    | 4.78 (4.45, 5.14)           | 0.81 (0.65, 1)                 |
| Oakland       | D                 | 1.35 (1.23, 1.48)    | 1.14 (1.03, 1.26)           | 0.25 (0.19, 0.32)              |
| San Diego     | A                 | 15.81 (14.23, 17.51) | 15.47 (13.84, 17.22)        | 1.71 (1.19, 2.37)              |
| San Diego     | B                 | 7.94 (7.37, 8.55)    | 7.64 (7.05, 8.26)           | 1.12 (0.91, 1.37)              |
| San Diego     | C                 | 4.85 (4.43, 5.3)     | 4.7 (4.25, 5.17)            | 0.67 (0.54, 0.83)              |
| San Diego     | D                 | 1.81 (1.62, 2.02)    | 1.82 (1.61, 2.05)           | 0.21 (0.15, 0.27)              |
| San Francisco | A                 | 11.16 (9.41, 13.11)  | 9.45 (7.92, 11.2)           | 1.33 (0.63, 2.67)              |
| San Francisco | B                 | 1.21 (1.12, 1.31)    | 0.98 (0.9, 1.06)            | 0.34 (0.26, 0.43)              |
| San Francisco | C                 | 3.52 (3.23, 3.82)    | 2.9 (2.65, 3.16)            | 0.78 (0.6, 1)                  |
| San Francisco | D                 | 2.36 (2.12, 2.62)    | 1.95 (1.73, 2.18)           | 0.46 (0.34, 0.6)               |

148 Avian species richness is shown for each city per HOLC grade (grades A = “best” and  
149 “greenlined”, B, C, and D = “hazardous” and “redlined”). We show overall species richness,  
150 native species richness, and nonnative species richness with mean and 95% credible intervals.

151 **Table S4.** City-level insect species richness.

| <b>City</b>   | <b>HOLC Grade</b> | <b>Mean Richness</b> | <b>Mean Native Richness</b> | <b>Mean Nonnative Richness</b> |
|---------------|-------------------|----------------------|-----------------------------|--------------------------------|
| Los Angeles   | A                 | 4.7 (4.42, 4.99)     | 2.34 (2.14, 2.56)           | 2.63 (2.41, 2.87)              |
| Los Angeles   | B                 | 8.75 (8.42, 9.09)    | 4.38 (4.16, 4.62)           | 4.89 (4.62, 5.16)              |
| Los Angeles   | C                 | 4.35 (4.24, 4.48)    | 2.32 (2.23, 2.41)           | 2.27 (2.18, 2.36)              |
| Los Angeles   | D                 | 2.98 (2.85, 3.12)    | 1.52 (1.43, 1.62)           | 1.62 (1.52, 1.73)              |
| Oakland       | A                 | 5.17 (4.64, 5.77)    | 2.24 (1.91, 2.6)            | 2.43 (2.05, 2.87)              |
| Oakland       | B                 | 9.83 (9.16, 10.52)   | 3.73 (3.38, 4.11)           | 5.32 (4.82, 5.86)              |
| Oakland       | C                 | 9.77 (9.22, 10.34)   | 4.27 (3.94, 4.61)           | 4.53 (4.16, 4.91)              |
| Oakland       | D                 | 2.95 (2.72, 3.18)    | 1.29 (1.15, 1.43)           | 1.36 (1.22, 1.52)              |
| San Diego     | A                 | 21.71 (19.54, 24.1)  | 12.81 (11.05, 14.76)        | 8.95 (7.67, 10.4)              |
| San Diego     | B                 | 8.46 (7.91, 9.04)    | 4.88 (4.44, 5.34)           | 3.68 (3.34, 4.04)              |
| San Diego     | C                 | 4.64 (4.31, 4.99)    | 2.72 (2.45, 3)              | 2 (1.79, 2.22)                 |
| San Diego     | D                 | 1.77 (1.61, 1.94)    | 1.09 (0.96, 1.24)           | 0.71 (0.62, 0.81)              |
| San Francisco | A                 | 16.18 (13.5, 19.2)   | 10.3 (7.94, 13.22)          | 8.01 (6.13, 10.18)             |
| San Francisco | B                 | 2.83 (2.6, 3.07)     | 2.11 (1.87, 2.36)           | 1.31 (1.17, 1.47)              |

|               |   |                   |                   |                   |
|---------------|---|-------------------|-------------------|-------------------|
| San Francisco | C | 3.53 (3.27, 3.81) | 2.31 (2.07, 2.58) | 1.84 (1.65, 2.03) |
| San Francisco | D | 2.91 (2.65, 3.2)  | 1.64 (1.43, 1.86) | 1.74 (1.51, 1.98) |

152 Insect species richness is shown for each city per HOLC grade (grades A = “best” and  
153 “greenlined”, B, C, and D = “hazardous” and “redlined”). We show overall species richness,  
154 native species richness, and nonnative species richness with mean and 95% credible intervals.

155 **Table S5.** City-level arachnid species richness.

| City          | HOLC Grade | Mean Richness     | Mean Native Richness | Mean Nonnative Richness |
|---------------|------------|-------------------|----------------------|-------------------------|
| Los Angeles   | A          | 1.35 (1.15, 1.58) | 0.41 (0.31, 0.54)    | 1.48 (1.23, 1.77)       |
| Los Angeles   | B          | 2.27 (2.07, 2.48) | 0.85 (0.72, 1)       | 2.14 (1.92, 2.37)       |
| Los Angeles   | C          | 1.02 (0.95, 1.09) | 0.5 (0.45, 0.57)     | 0.83 (0.76, 0.9)        |
| Los Angeles   | D          | 0.68 (0.61, 0.76) | 0.32 (0.26, 0.39)    | 0.57 (0.5, 0.65)        |
| Oakland       | A          | 0.66 (0.5, 0.87)  | 0.18 (0.12, 0.28)    | 0.65 (0.45, 0.92)       |
| Oakland       | B          | 2.57 (2.1, 3.11)  | 0.79 (0.57, 1.07)    | 1.94 (1.48, 2.49)       |
| Oakland       | C          | 2.39 (2.04, 2.77) | 0.85 (0.65, 1.08)    | 1.63 (1.34, 1.97)       |
| Oakland       | D          | 0.78 (0.63, 0.96) | 0.27 (0.2, 0.37)     | 0.58 (0.43, 0.77)       |
| San Diego     | A          | 4.09 (2.92, 5.59) | 2.27 (1.26, 3.74)    | 3.07 (1.89, 4.69)       |
| San Diego     | B          | 1.91 (1.56, 2.31) | 0.99 (0.71, 1.34)    | 1.95 (1.51, 2.48)       |
| San Diego     | C          | 1.06 (0.87, 1.28) | 0.83 (0.6, 1.12)     | 0.83 (0.64, 1.06)       |
| San Diego     | D          | 0.21 (0.16, 0.26) | 0.14 (0.1, 0.2)      | 0.18 (0.13, 0.24)       |
| San Francisco | A          | 2.25 (1.25, 3.65) | 1.51 (0.7, 2.88)     | 1.42 (0.59, 3.19)       |
| San Francisco | B          | 0.88 (0.71, 1.09) | 1.54 (1.06, 2.15)    | 0.62 (0.47, 0.81)       |
| San Francisco | C          | 0.66 (0.54, 0.8)  | 0.45 (0.32, 0.61)    | 0.68 (0.53, 0.87)       |
| San Francisco | D          | 0.56 (0.44, 0.72) | 0.34 (0.24, 0.48)    | 0.73 (0.5, 1.02)        |

156 Arachnid species richness is shown for each city per HOLC grade (grades A = “best” and  
157 “greenlined”, B, C, and D = “hazardous” and “redlined”). We show overall species richness,  
158 native species richness, and nonnative species richness with mean and 95% credible intervals.

159 **Table S6.** City-level reptile species richness.

| <b>City</b>   | <b>HOLC Grade</b> | <b>Mean Richness</b> | <b>Mean Native Richness</b> | <b>Mean Nonnative Richness</b> |
|---------------|-------------------|----------------------|-----------------------------|--------------------------------|
| Los Angeles   | A                 | 0.96 (0.79, 1.16)    | 0.88 (0.71, 1.07)           | 0.32 (0.17, 0.62)              |
| Los Angeles   | B                 | 1.65 (1.46, 1.86)    | 1.53 (1.34, 1.73)           | 0.68 (0.44, 0.99)              |
| Los Angeles   | C                 | 0.6 (0.54, 0.66)     | 0.53 (0.48, 0.59)           | 0.44 (0.32, 0.58)              |
| Los Angeles   | D                 | 0.32 (0.27, 0.37)    | 0.31 (0.26, 0.37)           | 0.12 (0.09, 0.17)              |
| Oakland       | A                 | 0.21 (0.14, 0.31)    | 0.22 (0.14, 0.33)           | 0.22 (0.08, 0.58)              |
| Oakland       | B                 | 0.43 (0.3, 0.61)     | 0.45 (0.31, 0.64)           | 0.47 (0.03, 1.89)              |
| Oakland       | C                 | 0.45 (0.33, 0.6)     | 0.43 (0.31, 0.59)           | 0.5 (0.19, 1.39)               |
| Oakland       | D                 | 0.26 (0.15, 0.43)    | 0.32 (0.18, 0.53)           | 0.11 (0.03, 0.43)              |
| San Diego     | A                 | 3.62 (2.49, 5.1)     | 3.51 (2.38, 4.98)           | 0.32 (0.12, 1.05)              |
| San Diego     | B                 | 1.46 (1.13, 1.84)    | 1.39 (1.07, 1.77)           | 1.33 (0.41, 4.58)              |
| San Diego     | C                 | 0.54 (0.4, 0.7)      | 0.48 (0.35, 0.64)           | 0.41 (0.2, 0.77)               |
| San Diego     | D                 | 0.18 (0.14, 0.24)    | 0.16 (0.11, 0.21)           | 0.11 (0.06, 0.18)              |
| San Francisco | A                 | 1.19 (0.47, 2.74)    | 1.06 (0.42, 2.43)           | 0.41 (0.1, 1.63)               |
| San Francisco | B                 | 1 (0.52, 1.74)       | 0.86 (0.42, 1.57)           | 1.41 (0.32, 4.81)              |
| San Francisco | C                 | 0.61 (0.33, 1.02)    | 0.58 (0.29, 1.05)           | 0.66 (0.2, 1.69)               |
| San Francisco | D                 | 0.25 (0.16, 0.38)    | 0.22 (0.13, 0.34)           | 0.24 (0.06, 1.08)              |

160 Reptile species richness is shown for each city per HOLC grade (grades A = “best” and  
161 “greenlined”, B, C, and D = “hazardous” and “redlined”). We show overall species richness,  
162 native species richness, and nonnative species richness with mean and 95% credible intervals.



163 **Table S7.** City-level amphibian species richness.

| City          | HOLC Grade | Mean Richness     | Mean Native Richness | Mean Nonnative Richness |
|---------------|------------|-------------------|----------------------|-------------------------|
| Los Angeles   | A          | 0.85 (0.59, 1.21) | 0.79 (0.51, 1.17)    | 0.79 (0.34, 1.76)       |
| Los Angeles   | B          | 1.53 (1.06, 2.14) | 1.63 (1.07, 2.38)    | 1.05 (0.49, 1.95)       |
| Los Angeles   | C          | 0.5 (0.4, 0.63)   | 0.56 (0.41, 0.75)    | 0.34 (0.2, 0.54)        |
| Los Angeles   | D          | 0.21 (0.15, 0.29) | 0.23 (0.15, 0.35)    | 0.15 (0.08, 0.27)       |
| Oakland       | A          | 1.36 (0.91, 2.01) | 1.34 (0.85, 2.08)    | 1.27 (0.3, 6.19)        |
| Oakland       | B          | 1.91 (1.42, 2.52) | 2 (1.48, 2.66)       | 2.13 (0.31, 9.82)       |
| Oakland       | C          | 0.81 (0.63, 1.02) | 0.83 (0.65, 1.06)    | 0.81 (0.22, 2.71)       |
| Oakland       | D          | 0.29 (0.2, 0.41)  | 0.3 (0.2, 0.42)      | 0.25 (0.02, 4.22)       |
| San Diego     | A          | 0.68 (0.41, 1.24) | 0.68 (0.38, 1.4)     | 1.22 (0.3, 5.89)        |
| San Diego     | B          | 0.79 (0.41, 1.37) | 0.84 (0.44, 1.45)    | 2.03 (0.11, 55.02)      |
| San Diego     | C          | 0.35 (0.18, 0.53) | 0.34 (0.16, 0.54)    | 0.88 (0.16, 6.67)       |
| San Diego     | D          | 0.13 (0.06, 0.23) | 0.14 (0.06, 0.25)    | 0.22 (0.04, 0.69)       |
| San Francisco | A          | 0.56 (0.32, 1.26) | 0.55 (0.3, 1.4)      | 0.04 (0.01, 0.68)       |
| San Francisco | B          | 0.21 (0.15, 0.3)  | 0.21 (0.14, 0.29)    | 0.12 (0.01, 2.47)       |
| San Francisco | C          | 0.31 (0.21, 0.49) | 0.32 (0.21, 0.5)     | 0.02 (0, 0.77)          |
| San Francisco | D          | 0.22 (0.13, 0.37) | 0.23 (0.13, 0.37)    | 0.01 (0, 0.27)          |

164 Amphibian species richness is shown for each city per HOLC grade (grades A = “best” and  
 165 “greenlined”, B, C, and D = “hazardous” and “redlined”). We show overall species richness,  
 166 native species richness, and nonnative species richness with mean and 95% credible intervals.

167 **Table S8.** Beta diversity pair-wise comparisons.

| Species   | City          | A-B                | A-C                 | A-D                 | B-C                 | B-D                 | C-D                |
|-----------|---------------|--------------------|---------------------|---------------------|---------------------|---------------------|--------------------|
| All       | All           | <b>p &lt; 0.05</b> | <b>p &lt; 0.001</b> | <b>p &lt; 0.001</b> | <b>p &lt; 0.001</b> | <b>p &lt; 0.001</b> | <b>p &lt; 0.01</b> |
| All       | Los Angeles   | <b>p &lt; 0.01</b> | <b>p &lt; 0.001</b> | <b>p &lt; 0.01</b>  | <b>p &lt; 0.01</b>  | <b>p &lt; 0.001</b> | <b>p &lt; 0.05</b> |
| All       | Oakland       | p = 0.068          | p = 0.053           | <b>p &lt; 0.05</b>  | <b>p &lt; 0.05</b>  | <b>p &lt; 0.05</b>  | p = 0.221          |
| All       | San Diego     | p = 0.508          | <b>p &lt; 0.05</b>  | <b>p &lt; 0.05</b>  | p = 0.761           | p = 0.508           | p = 0.761          |
| All       | San Francisco | p = 0.0922         | <b>p &lt; 0.01</b>  | <b>p &lt; 0.001</b> | p = 0.0708          | <b>p &lt; 0.001</b> | <b>p &lt; 0.01</b> |
| Native    | All           | <b>p &lt; 0.01</b> | <b>p &lt; 0.001</b> | <b>p &lt; 0.001</b> | <b>p &lt; 0.001</b> | <b>p &lt; 0.001</b> | <b>p &lt; 0.05</b> |
| Native    | Los Angeles   | <b>p &lt; 0.01</b> | <b>p &lt; 0.001</b> | <b>p &lt; 0.01</b>  | <b>p &lt; 0.01</b>  | <b>p &lt; 0.01</b>  | p = 0.0707         |
| Native    | Oakland       | p = 0.073          | <b>p &lt; 0.05</b>  | <b>p &lt; 0.05</b>  | <b>p &lt; 0.05</b>  | <b>p &lt; 0.05</b>  | p = 0.363          |
| Native    | San Diego     | p = 0.619          | p = 0.091           | p = 0.091           | p = 0.886           | p = 0.696           | p = 0.696          |
| Native    | San Francisco | p = 0.2626         | <b>p &lt; 0.05</b>  | <b>p &lt; 0.001</b> | p = 0.0557          | <b>p &lt; 0.001</b> | <b>p &lt; 0.05</b> |
| Nonnative | All           | p = 0.26967        | <b>p &lt; 0.001</b> | <b>p &lt; 0.001</b> | <b>p &lt; 0.001</b> | <b>p &lt; 0.001</b> | <b>p &lt; 0.01</b> |
| Nonnative | Los Angeles   | p = 0.0972         | <b>p &lt; 0.001</b> | <b>p &lt; 0.01</b>  | <b>p &lt; 0.01</b>  | <b>p &lt; 0.001</b> | <b>p &lt; 0.01</b> |
| Nonnative | Oakland       | p = 0.326          | p = 0.326           | <b>p &lt; 0.05</b>  | p = 0.089           | <b>p &lt; 0.05</b>  | p = 0.197          |
| Nonnative | San Diego     | p = 0.630          | p = 0.071           | <b>p &lt; 0.05</b>  | p = 0.630           | p = 0.376           | p = 0.936          |
| Nonnative | San Francisco | <b>p &lt; 0.05</b> | <b>p &lt; 0.01</b>  | <b>p &lt; 0.001</b> | p = 0.3210          | <b>p &lt; 0.01</b>  | <b>p &lt; 0.05</b> |

168 Pair-wise comparisons for beta diversity via PERMANOVA for each city is shown for all  
 169 species, native species, and nonnative species. We used a PERMANOVA with 10000  
 170 permutations to determine which specific HOLC grade dyads (e.g., A vs. C, A vs. D, etc.)

171 significantly differed in species assemblage with a Benjamin-Hochberg correction. Significant  
172 comparisons are bolded.
